Anesthesiology  
68:174, 1988

## On the Use of Priming to Test for Anaphylactoid Reactions to Nondepolarizing Muscle Relaxants

*To the Editor:*—In their recent report of a histaminoid reaction to 17  $\mu\text{g}/\text{kg}$  of vecuronium,<sup>1</sup> Durrani and O'Hara advocate the routine administration of priming doses of nondepolarizing relaxants to awake patients as a test for anaphylactoid reactions to these drugs.

The dose of vecuronium administered by the authors (1 mg) was probably chosen because this drug is often reconstituted as 5 cc of a 2-mg/cc solution, and, thus, 0.5 cc is easily administered from a 5-cc syringe.

Engbaek *et al.*<sup>2</sup> concluded that 10  $\mu\text{g}/\text{kg}$  represents the maximum dose of vecuronium allowable for awake patients. Higher doses often caused subjective feelings of inability to breathe (such as those noted in the case reported by Durrani and O'Hara) and may put patients at risk for aspiration pneumonia.<sup>3</sup>

Priming doses should be carefully administered on a mg/kg basis, rather than what can be quickly delivered from standard solutions. Furthermore, even allowable priming doses are at or may exceed the margin of safety<sup>4</sup> of the neuromuscular junction, and some patients may display unexpected sensitivities.<sup>2</sup>

I, therefore, question the logic of the routine use of

priming doses, even if carefully administered, to detect rare histaminoid reactions, since the neuromuscular effects of these drugs are often not benign.

MITCHEL SOSIS, M.D., PH.D.  
Assistant Professor of Anesthesiology  
Department of Anesthesia  
Indiana University School of Medicine  
Indianapolis, Indiana 46223

### REFERENCES

1. Durrani Z, O'Hara J: Histaminoid reaction from vecuronium priming: A case report. *ANESTHESIOLOGY* 67:130-132, 1987
2. Engbaek J, Howard-Hansen P, Ording H, Viby-Mogensen J: Precurarization with vecuronium and pancuronium in awake, healthy volunteers: Influence on neuromuscular transmission and pulmonary function. *Acta Anaesthesiol Scand* 29:117-120, 1985
3. Musich J, Walts LF: Pulmonary aspiration after a priming dose of vecuronium. *ANESTHESIOLOGY* 64:517-519, 1986
4. Paton WDM, Waud DR: The margin of safety of neuromuscular transmission. *J Physiol (Lond)* 191:59-90, 1967

(Accepted for publication September 18, 1987.)

Anesthesiology  
68:174, 1988

*In Reply:*—We appreciate the comments made by Dr. Mitchel Sosis regarding our clinical case report.<sup>1</sup> A priming dose of 1 mg (16.6  $\mu\text{g}/\text{kg}$ ) was given because of circumstances described by Dr. Sosis. Since then, we have been using tuberculin syringes for more precision of priming doses.

None of the anesthetic agents and adjuvant drugs are completely benign in any dosages, and, therefore, it is healthy to express concerns and observe vigilance.

We believe that an optimum priming dose is 10  $\mu\text{g}/\text{kg}$ , as shown by Toboada *et al.*<sup>2</sup> Our intent was not to recommend either higher priming doses, or the use of the priming principle for the sole purpose of detecting histaminoid reaction, although routine use of priming dose will help detect histaminoid reaction in addition to facilitating rapid endotracheal intubation.

ZIA DURRANI, M.D.  
Associate Professor of Anesthesiology  
University of Illinois

JOHN O'HARA  
Resident in Anesthesiology  
University of Illinois

### REFERENCES

1. Durrani Z, O'Hara J: Histaminoid reaction from vecuronium priming: A case report. *ANESTHESIOLOGY* 67:130-132, 1987
2. Toboada J, Rupp S, Miller R: Refining the priming principle for vecurominum during rapid-sequence induction of anesthesia. *ANESTHESIOLOGY* 64:243-247, 1986

(Accepted for publication September 18, 1987.)
